# Supplementary material for: Human eIF2A has a minimal role in translation initiation and in uORF-mediated translational control in HeLa cells
Source: bioRxiv preprint, doi:10.1101/2024.11.20.624465, version 2 (2025-05-05)
Supplement: Supplementary Table 1 [file 624465_file02.xlsx]

## Sheet: Sheet1
Suppl. Table 1: Sequences of siRNA against eIF2A used in this study. (Equimolar mix was used.)
D-014766-01	GCUCCCAGGUUACGGGUUA
D-014766-02	GAUUUGGAAUUGGGUAUUU
D-014766-03	GCAGAUAAAGUUACAAUGC
D-014766-04	CCACAAUCAGGAAACGAUA
